# Supplementary material
Source: Springer Nature journal article supplement (https://www.springermedizin.de/resource/supplementary/13256_2009_1383_MOESM3_ESM.pdf/9647780)

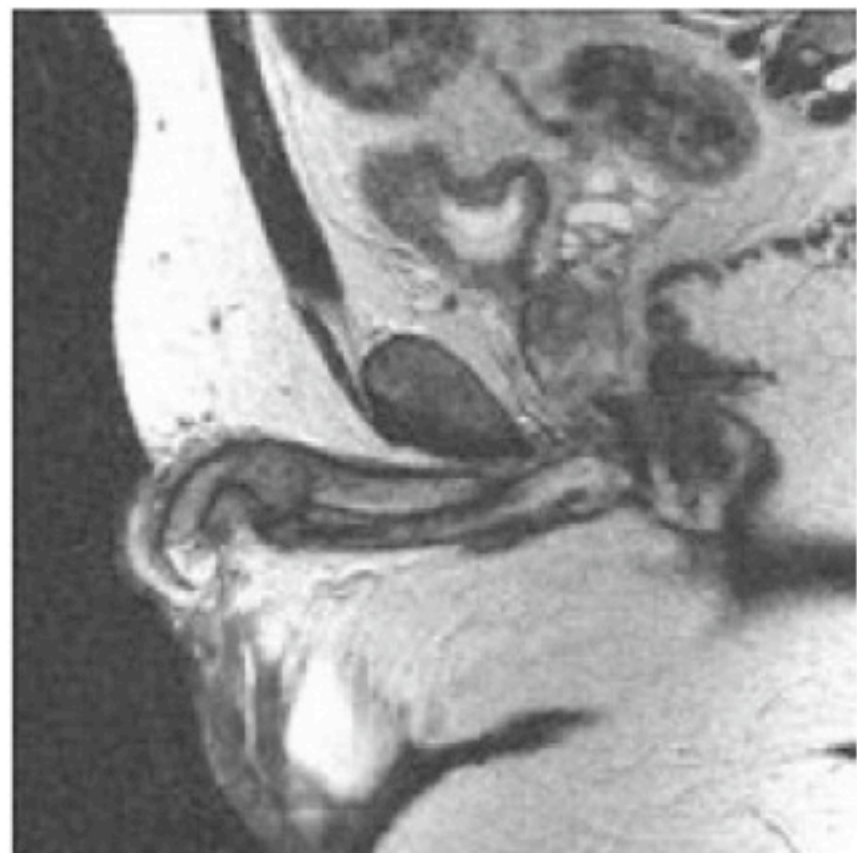

Fig 3a

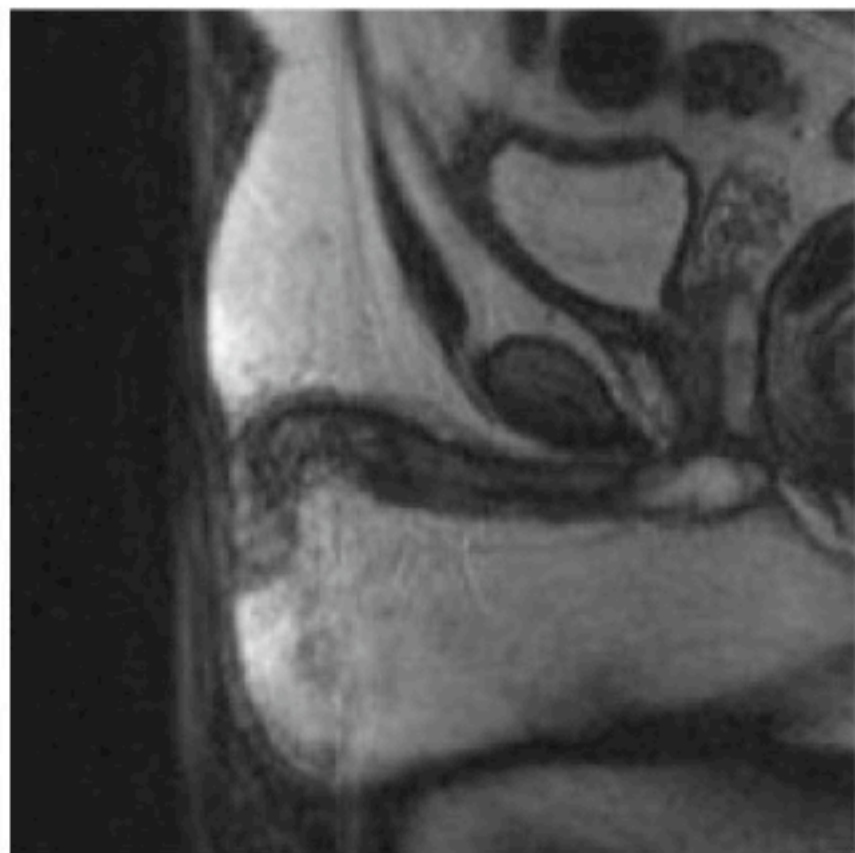

Fig 3b

Supplement: MOESM3 [file 9647780]
